# Supplementary material
Source: PubMed Central journal article supplement (PMC7554260)
Supplement: NIHMS1609150-supplement-2.pdf [file NIHMS1609150-supplement-2.pdf]

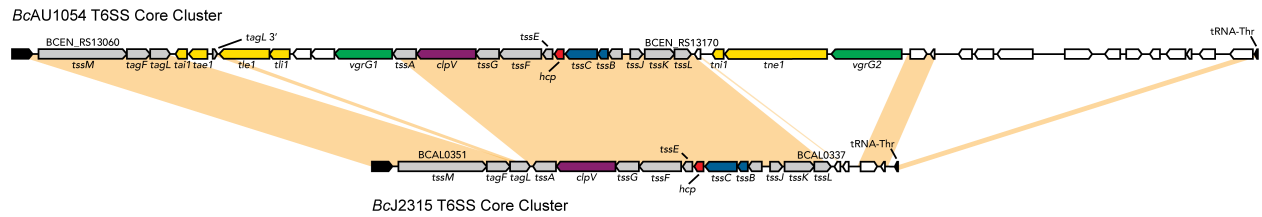

**Figure S1. The *BcAU1054* T6SS core cluster is homologous to the *BcJ2315* T6SS core cluster, though contains insertions; Related to Figure 1.**

The genomic regions encoding the T6SSs of *BcAU1054* and *BcJ2315* were aligned to each other using Mauve. Orange shading represents regions of homology ( $\geq 90\%$  nucleotide identity). All the structural protein-encoding genes are homologous ( $\geq 90\%$  nucleotide identity) between the two strains, though the *BcAU1054* core cluster has multiple insertions – regions spanning *tae1-tai1*, *vgrG1-tle1*, *vgrG2-tni2*, and genes downstream of the core cluster predicted to encode proteins involved in phage and mobile genetic elements (see **Figure 1**).

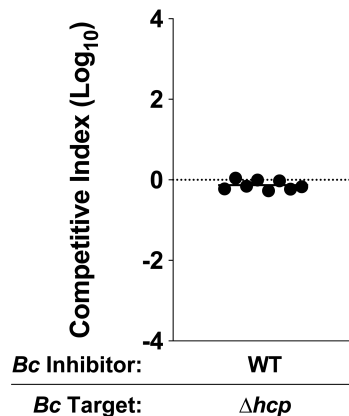

**Figure S2. *BcAU1054*  $\Delta hcp$  does not have a growth defect; Related to Figure 1.**

5 h cocultures between *BcAU1054* WT and  $\Delta hcp$  strains. Circles represent individual cocultures from two biological replicates, each with four technical replicates. Solid horizontal line represents mean  $\log_{10}$  C.I. Dotted horizontal line ( $\log_{10}$  C.I. = 0) indicates no competitive advantage for either inhibitor or target.

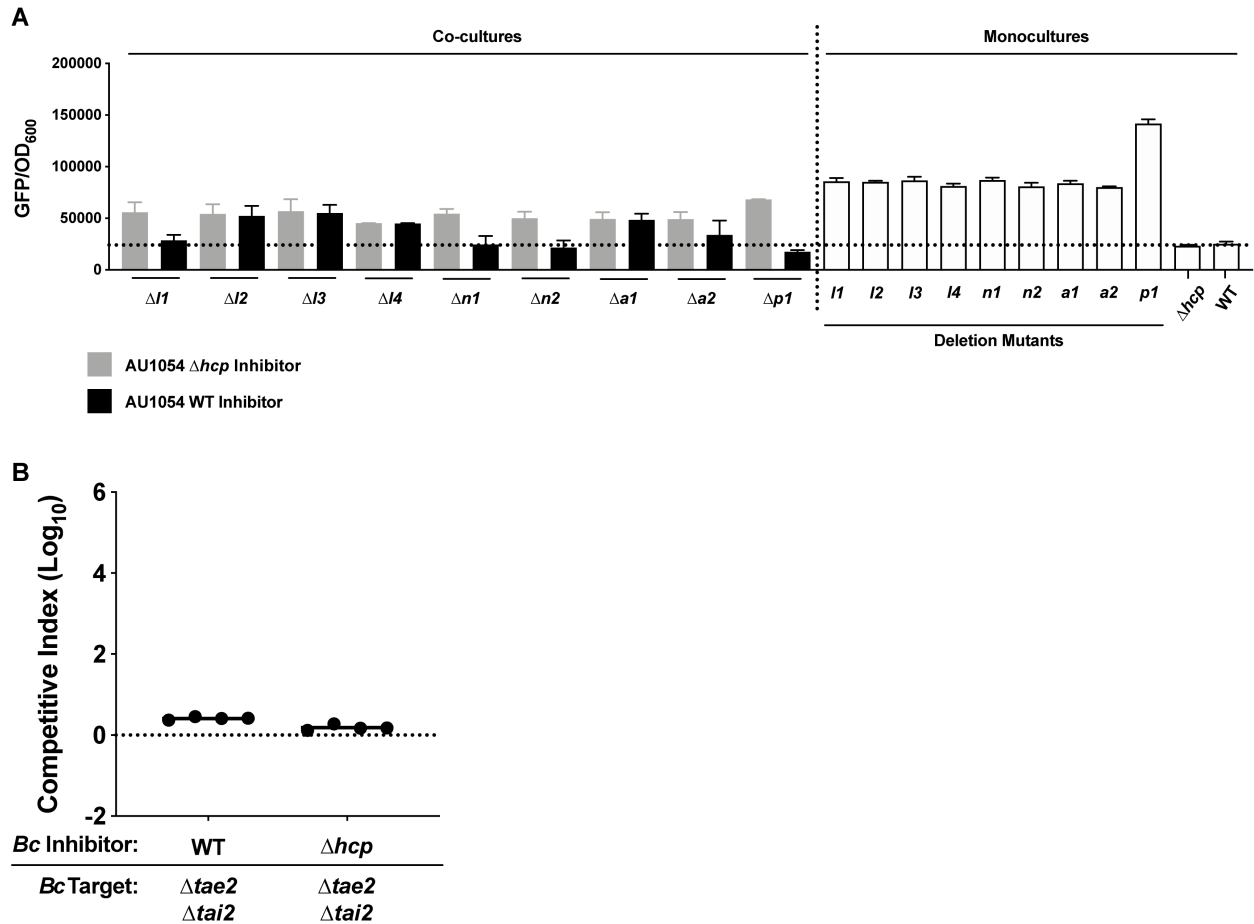

**Figure S3. Screening approach to identify probable *BcAU1054* T6SS E-I pairs;** Related to Figure 2.

(A) GFP/OD<sub>600</sub> values for ~20 h cocultures between WT and  $\Delta hcp$  *BcAU1054* inhibitor strains and *BcAU1054* E-I deletion mutants constitutively producing GFP, as well as GFP/OD<sub>600</sub> values for ~20 h monocultures of each strain. GFP measured at 485 nm excitation and 530 nm emission. Data resulting from at least two biological replicates, with height of bar representing mean GFP/OD<sub>600</sub> value and error bars representing one standard deviation. Dotted horizontal line represents baseline GFP/OD<sub>600</sub> value, taken from non-GFP-producing WT and  $\Delta hcp$  *BcAU1054* monocultures. See **Figure 1** and **Table S2** for location of E-I-encoding gene pairs and predicted effector activity, respectively. (B) 5 h competition experiment between WT and  $\Delta hcp$  *BcAU1054* inhibitor strains and *BcAU1054*  $\Delta tae2\Delta tai2$  target strain. *BcAU1054*  $\Delta tae2\Delta tai2$  is not outcompeted in a T6SS-dependent manner and thus *tae2-tai2* likely do not encode a T6SS E-I pair. Circles represent individual cocultures (four technical replicates for each competition). Solid horizontal lines represent mean log<sub>10</sub> C.I. values. Dotted horizontal line (log<sub>10</sub> C.I. = 0) indicates no competitive advantage for either inhibitor or target.

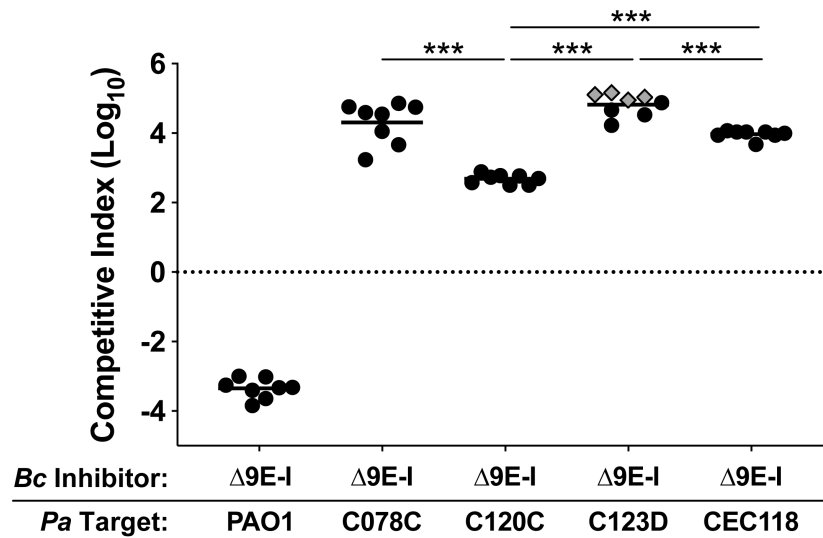

**Figure S4. *Bc*AU1054 T6SS effectors exhibit target strain-specific variability in toxicity;**

Related to Figure 3.

Interbacterial competition experiments between *Bc*AU1054  $\Delta 9E-I$  inhibitor strain and PAO1, C078C, C120C, C123D, and CEC118 *P. aeruginosa* target strains. Circles/diamonds represent individual cocultures from two biological replicates, each with four technical replicates. Grey-filled diamonds represent competitions from which no target cells were recovered. Solid horizontal lines represent mean  $\log_{10}$  C.I. values. Dotted horizontal line ( $\log_{10}$  C.I. = 0) indicates no competitive advantage for either inhibitor or target. \*\*\* $P < 0.0005$ , Mann-Whitney test.

**Table S2. Bioinformatically-predicted *BcAU1054* T6SS E-I pairs and predicted effector enzymatic activities; Related to Figures 1 and 2.**

| E-I Pair         | Locus Tag                                      | Associated <i>vgrG</i> | Predicted Effector Activity | Notes                                                                                                                                                                                                                                                                        |
|------------------|------------------------------------------------|------------------------|-----------------------------|------------------------------------------------------------------------------------------------------------------------------------------------------------------------------------------------------------------------------------------------------------------------------|
| <i>t1e1-t1i1</i> | BCEN_RS13090-<br>BCEN_RS13095                  | <i>vgrG1</i>           | Phospholipase               |                                                                                                                                                                                                                                                                              |
| <i>t1e2-t1i2</i> | BCEN_RS06980-<br>BCEN_RS06975                  | <i>vgrG3</i>           | Phospholipase               | Referred to as <i>t1e5-t1i5</i> in (Russell <i>et al.</i> , 2013)                                                                                                                                                                                                            |
| <i>t1e3-t1i3</i> | BCEN_RS25350-<br>BCEN_RS25355                  | <i>vgrG7</i>           | Phospholipase               |                                                                                                                                                                                                                                                                              |
| <i>t1e4-t1i4</i> | BCEN_RS23700-<br>BCEN_RS23705                  | None                   | Phospholipase               | <i>t1e4</i> has an RHS domain; <i>t1i4</i> has DUF3304, which otherwise is present in the <i>BcAU1054</i> genome only in <i>t1i1</i> and <i>t1i3</i>                                                                                                                         |
| <i>t1e1-t1i1</i> | BCEN_RS13180-<br>(not annotated)               | <i>vgrG2</i>           | Nuclease                    | See <b>Table S1</b> for <i>t1i1</i> sequence                                                                                                                                                                                                                                 |
| <i>t1e2-t1i2</i> | BCEN_RS16675-<br>Bcen_3345 (old locus tag)     | <i>vgrG5</i>           | Nuclease                    | <i>t1i2</i> not annotated with new locus tags (see <b>Table S1</b> for <i>t1i2</i> sequence)                                                                                                                                                                                 |
| <i>t1e1-t1i1</i> | BCEN_RS13080-<br>BCEN_RS13075                  | None                   | Amidase                     | May have inserted into T6SS core cluster via transposon (see duplication of 3' end of <i>tagL</i> in <b>Figure 1</b> )                                                                                                                                                       |
| <i>t1e2-t1i2</i> | BCEN_RS10100-<br>BCEN_RS10105-<br>BCEN-RS10110 | <i>vgrG4</i>           | Amidase                     | Two annotated ORFs (10100 and 10105) have glycosylhydrolase domains and may encode an amidase effector, sequencing errors may have split into two ORFs                                                                                                                       |
| <i>t1e1-t1i1</i> | BCEN_RS22905-<br>BCEN_RS22900                  | <i>vgrG6</i>           | Pore-forming toxin          | Tpe1 has homology to <i>V. cholerae</i> VasX (Miyata <i>et al.</i> , 2013) and <i>B. thailandensis</i> BTH_12691 (Russell <i>et al.</i> , 2012); <i>t1i1</i> is misannotated – full-length gene is 969 bps (126 bps missing from 5' end in annotation, see <b>Table S1</b> ) |

**Table S3. Bacterial strains used in this study; Related to STAR Methods.**

| Strain Name                                               | Source                                                       | WGS Identifier         |
|-----------------------------------------------------------|--------------------------------------------------------------|------------------------|
| <i>Burkholderia cepacia</i> complex strains               |                                                              |                        |
| BcAU1054                                                  | BcRLR*                                                       | GCA_000014085.1        |
| BcAU1054 <i>attTn7::lacZ</i>                              | This paper                                                   |                        |
| BcAU1054 $\Delta hcp$                                     | This paper                                                   |                        |
| BcAU1054 $\Delta hcp attTn7::hcp$                         | This paper                                                   |                        |
| BcAU1054 $\Delta hcp attTn7::lacZ$                        | This paper                                                   |                        |
| BcAU1054 $\Delta tle1\Delta tli1$                         | This paper                                                   |                        |
| BcAU1054 $\Delta tle1\Delta tli1 attTn7::gfp$             | This paper                                                   |                        |
| BcAU1054 $\Delta tle1\Delta tli1 attTn7::tli1$            | This paper                                                   |                        |
| BcAU1054 $\Delta tle2\Delta tli2$                         | This paper                                                   |                        |
| BcAU1054 $\Delta tle2\Delta tli2 attTn7::gfp$             | This paper                                                   |                        |
| BcAU1054 $\Delta tle3\Delta tli3$                         | This paper                                                   |                        |
| BcAU1054 $\Delta tle3\Delta tli3 attTn7::gfp$             | This paper                                                   |                        |
| BcAU1054 $\Delta tle4\Delta tli4$                         | This paper                                                   |                        |
| BcAU1054 $\Delta tle4\Delta tli4 attTn7::gfp$             | This paper                                                   |                        |
| BcAU1054 $\Delta tne1\Delta tni1$                         | This paper                                                   |                        |
| BcAU1054 $\Delta tne1\Delta tni1 attTn7::gfp$             | This paper                                                   |                        |
| BcAU1054 $\Delta tne1\Delta tni1 attTn7::tni1$            | This paper                                                   |                        |
| BcAU1054 $\Delta tne2\Delta tni2$                         | This paper                                                   |                        |
| BcAU1054 $\Delta tne2\Delta tni2 attTn7::gfp$             | This paper                                                   |                        |
| BcAU1054 $\Delta tne2\Delta tni2 attTn7::tni2$            | This paper                                                   |                        |
| BcAU1054 $\Delta tae1\Delta tai1$                         | This paper                                                   |                        |
| BcAU1054 $\Delta tae1\Delta tai1 attTn7::gfp$             | This paper                                                   |                        |
| BcAU1054 $\Delta tae2\Delta tai2$                         | This paper                                                   |                        |
| BcAU1054 $\Delta tae2\Delta tai2 attTn7::gfp$             | This paper                                                   |                        |
| BcAU1054 $\Delta tpe1\Delta tpi1$                         | This paper                                                   |                        |
| BcAU1054 $\Delta tpe1\Delta tpi1 attTn7::gfp$             | This paper                                                   |                        |
| BcAU1054 $\Delta tpe1\Delta tpi1 attTn7::tpi1$            | This paper                                                   |                        |
| BcAU1054 $\Delta 9E-I$                                    | This paper                                                   |                        |
| BmCGD2M                                                   | BcRLR*                                                       | GCA_000182295.1        |
| BmCGD2M <i>tssC1::pAP82</i>                               | This paper                                                   |                        |
| BdAU0158                                                  | BcRLR*                                                       | GCA_000959505.1        |
| BdAU0158 <i>tssC1::pAP83</i>                              | This paper                                                   |                        |
| BcAU4392                                                  | BcRLR*                                                       |                        |
| BcAU5161                                                  | BcRLR*                                                       |                        |
| BcAU7523                                                  | BcRLR*                                                       |                        |
| BcAU10618                                                 | BcRLR*                                                       |                        |
| BcAU19695                                                 | BcRLR*                                                       |                        |
| BcAU22760                                                 | BcRLR*                                                       |                        |
| BcAU23782                                                 | BcRLR*                                                       |                        |
| BcAU29704                                                 | BcRLR*                                                       |                        |
| <i>Pseudomonas aeruginosa</i> strains                     |                                                              |                        |
| PAO1                                                      | (Holloway, 1955) Wolfgang Lab collection                     | GCA_000006765.1        |
| PAO1 <i>vipA1::Tn</i><br>(PAO1 <i>vipA1::ISphoA/hah</i> ) | (Held <i>et al.</i> , 2012)                                  |                        |
| CEC32                                                     | (Burns <i>et al.</i> , 2001; Rosenfeld <i>et al.</i> , 2001) | BioProject PRJNA607994 |
| CEC36                                                     | (Burns <i>et al.</i> , 2001; Rosenfeld <i>et al.</i> , 2001) | BioProject PRJNA607994 |

|                                 |                                                              |                        |
|---------------------------------|--------------------------------------------------------------|------------------------|
| CEC42                           | (Burns <i>et al.</i> , 2001; Rosenfeld <i>et al.</i> , 2001) | BioProject PRJNA607994 |
| CEC44                           | (Burns <i>et al.</i> , 2001; Rosenfeld <i>et al.</i> , 2001) | BioProject PRJNA607994 |
| CEC66                           | (Burns <i>et al.</i> , 2001; Rosenfeld <i>et al.</i> , 2001) | BioProject PRJNA607994 |
| CEC73                           | (Burns <i>et al.</i> , 2001; Rosenfeld <i>et al.</i> , 2001) | BioProject PRJNA607994 |
| CEC83                           | (Burns <i>et al.</i> , 2001; Rosenfeld <i>et al.</i> , 2001) | BioProject PRJNA607994 |
| CEC87                           | (Burns <i>et al.</i> , 2001; Rosenfeld <i>et al.</i> , 2001) | BioProject PRJNA607994 |
| CEC112                          | (Burns <i>et al.</i> , 2001; Rosenfeld <i>et al.</i> , 2001) | BioProject PRJNA607994 |
| C078C                           | (Radlinski <i>et al.</i> , 2017) (referred to as BC236)      | BioProject PRJNA609958 |
| C078C <i>attTn7::pppA</i>       | This paper                                                   |                        |
| C120C                           | (Radlinski <i>et al.</i> , 2017) (referred to as BC238)      | BioProject PRJNA609958 |
| C123D                           | (Radlinski <i>et al.</i> , 2017) (referred to as BC239)      | BioProject PRJNA609958 |
| CEC118                          | (Burns <i>et al.</i> , 2001; Rosenfeld <i>et al.</i> , 2001) | BioProject PRJNA607994 |
| CEC118 <i>attTn7::fha1</i>      | This paper                                                   |                        |
| CEC119                          | (Burns <i>et al.</i> , 2001; Rosenfeld <i>et al.</i> , 2001) | BioProject PRJNA607994 |
| CEC120                          | (Burns <i>et al.</i> , 2001; Rosenfeld <i>et al.</i> , 2001) | BioProject PRJNA607994 |
| CEC121                          | (Burns <i>et al.</i> , 2001; Rosenfeld <i>et al.</i> , 2001) | BioProject PRJNA607994 |
| CEC122                          | (Burns <i>et al.</i> , 2001; Rosenfeld <i>et al.</i> , 2001) | BioProject PRJNA607994 |
| CEC116                          | (Burns <i>et al.</i> , 2001; Rosenfeld <i>et al.</i> , 2001) | BioProject PRJNA607994 |
| PaAU4391                        | BcRLR*                                                       |                        |
| PaAU5159                        | BcRLR*                                                       |                        |
| PaAU7618                        | BcRLR*                                                       |                        |
| PaAU10617                       | BcRLR*                                                       |                        |
| PaAU19694                       | BcRLR*                                                       |                        |
| PaAU22775                       | BcRLR*                                                       |                        |
| PaAU23781                       | BcRLR*                                                       |                        |
| PaAU29744                       | BcRLR*                                                       |                        |
| <i>Escherichia coli</i> strains |                                                              |                        |
| DH5 $\alpha$                    | Cotter Lab collection                                        |                        |
| RHO3                            | (López <i>et al.</i> , 2009) Cotter Lab collection           |                        |

\**Burkholderia cepacia* Research Laboratory and Repository, University of Michigan, Ann Arbor, MI USA.

**Table S4. Plasmids used in this study; Related to STAR Methods.**

| <b>Plasmid Name</b>                                                            | <b>Source</b>            | <b>Identifier</b> |
|--------------------------------------------------------------------------------|--------------------------|-------------------|
| pEXKm5                                                                         | (López et al., 2009)     | N/A               |
| pAP17 (pEXKm5- $\Delta$ <i>hcp</i> <sub>BcAU1054</sub> )                       | This paper               | N/A               |
| pAP65 (pEXKm5- $\Delta$ <i>t1e1</i> $\Delta$ <i>tli1</i> <sub>BcAU1054</sub> ) | This paper               | N/A               |
| pAP63 (pEXKm5- $\Delta$ <i>t1e2</i> $\Delta$ <i>tli2</i> <sub>BcAU1054</sub> ) | This paper               | N/A               |
| pAP66 (pEXKm5- $\Delta$ <i>t1e3</i> $\Delta$ <i>tli3</i> <sub>BcAU1054</sub> ) | This paper               | N/A               |
| pAP73 (pEXKm5- $\Delta$ <i>t1e4</i> $\Delta$ <i>tli4</i> <sub>BcAU1054</sub> ) | This paper               | N/A               |
| pAP64 (pEXKm5- $\Delta$ <i>tne1</i> $\Delta$ <i>tni1</i> <sub>BcAU1054</sub> ) | This paper               | N/A               |
| pAP25 (pEXKm5- $\Delta$ <i>tne2</i> $\Delta$ <i>tni2</i> <sub>BcAU1054</sub> ) | This paper               | N/A               |
| pAP67 (pEXKm5- $\Delta$ <i>tae1</i> $\Delta$ <i>tai1</i> <sub>BcAU1054</sub> ) | This paper               | N/A               |
| pAP70 (pEXKm5- $\Delta$ <i>tae2</i> $\Delta$ <i>tai2</i> <sub>BcAU1054</sub> ) | This paper               | N/A               |
| pAP72 (pEXKm5- $\Delta$ <i>tpe1</i> $\Delta$ <i>tpi1</i> <sub>BcAU1054</sub> ) | This paper               | N/A               |
| pUCS12Km                                                                       | (Anderson et al., 2012)  | N/A               |
| pAP53 (pUCS12Km- <i>hcp</i> <sub>BcAU1054</sub> )                              | This paper               | N/A               |
| pAP68 (pUCS12Km- <i>tli1</i> <sub>BcAU1054</sub> )                             | This paper               | N/A               |
| pAP69 (pUCS12Km- <i>tni1</i> <sub>BcAU1054</sub> )                             | This paper               | N/A               |
| pAP26 (pUCS12Km- <i>tni2</i> <sub>BcAU1054</sub> )                             | This paper               | N/A               |
| pAP78 (pUCS12Km- <i>tpi1</i> <sub>BcAU1054</sub> )                             | This paper               | N/A               |
| pUC18T-mini-Tn7T-Tet                                                           | (Anderson et al., 2012)  | N/A               |
| pAP85 (pUCS12Tet- <i>pppA</i> <sub>PAO1</sub> )                                | This paper               | N/A               |
| pAP85 (pUCS12Tet- <i>fha1</i> <sub>PAO1</sub> )                                | This paper               | N/A               |
| pJN105                                                                         | (Newman and Fuqua, 1999) | N/A               |
| pJN- <i>rsmZ</i>                                                               | (Intile et al., 2014)    | N/A               |
| pUC18T-mini-Tn7T-Km                                                            | (Choi et al., 2005)      | N/A               |
| pAP82 (pUC18T-mini-Tn7T-Km- <i>tssC1</i> <sub>BmCGD2M</sub> )                  | This paper               | N/A               |
| pAP83 (pUC18T-mini-Tn7T-Km- <i>tssC1</i> <sub>BdAU0158</sub> )                 | This paper               | N/A               |
| pUC18T-mini-Tn7T-Tp- <i>P<sub>S12</sub>-mCherry</i>                            | (LeRoux et al., 2012)    | N/A               |
| pUC18T-mini-Tn7T-Tp                                                            | This paper               | N/A               |
| pECG10 (pUCS12Km- <i>lacZ</i> )                                                | (Anderson et al., 2012)  | N/A               |
| pUC18-mini-Tn7- <i>kan-gfp</i>                                                 | (Norris et al., 2010)    | N/A               |
| pTNS3                                                                          | (Choi et al., 2008)      | N/A               |
